# Supplementary material
Source: PubMed Central journal article supplement (PMC5605278)
Supplement: NIHMS903857-supplement-suppl.pdf [file NIHMS903857-supplement-suppl.pdf]

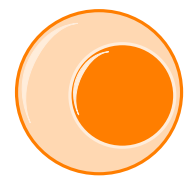

$\beta$  cells

ER stress  
→

ATF4  
CHOP  
XBP1s  
Bip  
GRP94

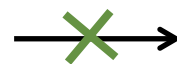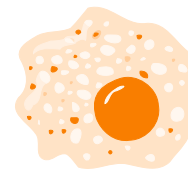

cell death  
dysfunction

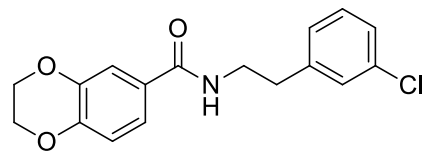

**1**

Maximum activity = 42%  
EC<sub>50</sub> = 21  $\mu$ M

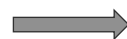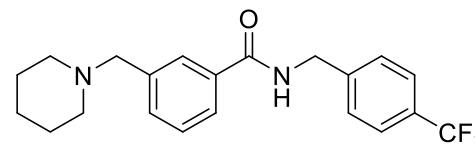

**13d**

Maximum activity = 97%  
EC<sub>50</sub> = 32 nM
